# Supplementary material
Source: publisher site journal article supplement (https://www.dovepress.com/get_supplementary_file.php?f=392947.docx)
Supplement: Supplementary file 1 [file get_supplementary_file.php]

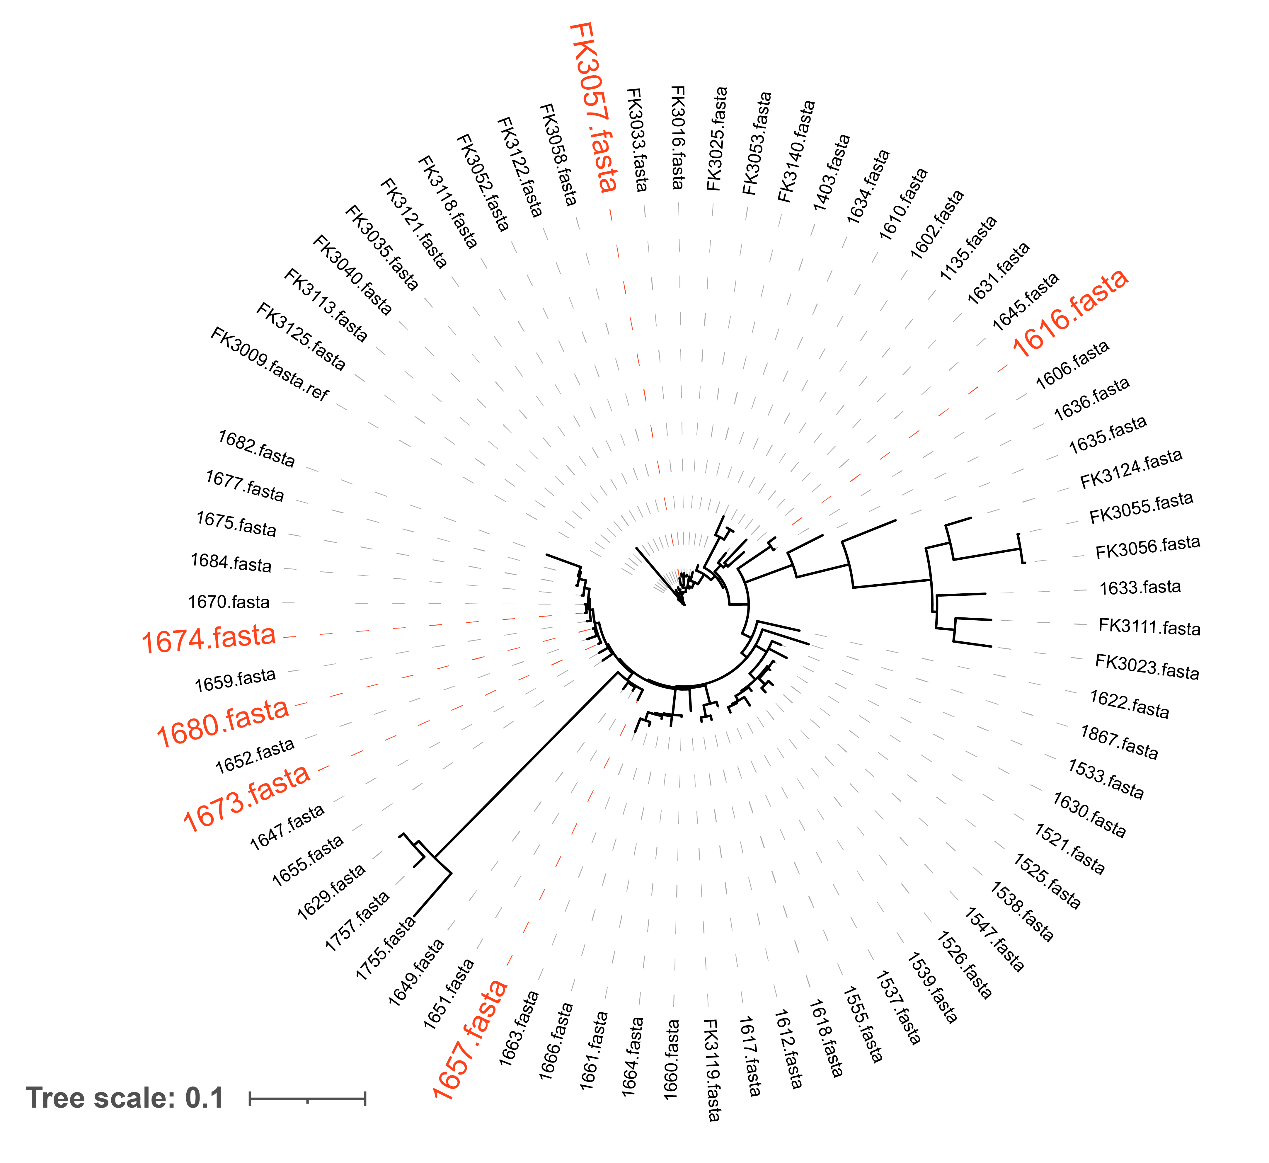


**Figure S1. Core-genome phylogenetic tree of ST11-KL64 isolates. The red mark indicated the 6 isolates in this study.**
